# Supplementary material for: Endometrial Cancer Risk in Women With Germline BRCA1 or BRCA2 Mutations: Multicenter Cohort Study
Source: PubMed Central journal article supplement — J Natl Cancer Inst. 2021 Mar 12;113(9):1203–11. doi: 10.1093/jnci/djab036 (PMC8418438; doi:10.1093/jnci/djab036), 2021-03-12
Supplement: djab036_supplementary_data.pdf [file djab036_supplementary_data.pdf]

## SUPPLEMENTARY MATERIALS

### Supplementary Methods

#### HEBON cohort study

Women are eligible for inclusion in the “Hereditary Breast and Ovarian cancer study, the Netherlands (HEBON cohort study)<sup>1, 2</sup> if they have undergone genetic testing for *BRCA1/2* and *CHEK2* in one of the participating centres (all Dutch academic medical centres and the Netherlands Cancer Institute). The HEBON cohort study collects data from participants via questionnaires and input from the Netherlands Cancer Registry (NCR), the Dutch Pathology Registry (PALGA)<sup>3</sup> and the municipal administration (BRP). The HEBON cohort study is performed in accordance with the declaration of Helsinki.

#### Data collection

Data entry into the central HEBON database is exclusively performed by trained data managers. Data on the type of mutation (*BRCA1*, *BRCA2*) and the date of the *BRCA1/2* DNA test were retrieved from the hospitals where screening took place. Data on personal cancer history (based on topographical and morphological codes; ICD-0-3 codes; <http://codes.iarc.fr/>), date/age/year of cancer diagnosis and treatment history (latter only available for breast cancer (BC) and tubo-ovarian cancer (OC)) were retrieved from the NCR, which registers all cancer diagnoses in the Netherlands and includes other variables such as treatment history. If additional data were found in pathology reports obtained via PALGA (e.g. on treatment history), these were added to the previously mentioned variables. Data on risk-reducing salpingo-oophorectomies (RRSO) and date of RRSO was obtained via PALGA. Data on deaths and date of deaths were obtained via the BRP, supplemented with data from the NCR, pathology reports and information obtained from family members.

For *BRCA1/2* mutation carriers who provided informed consent the most recent data input from the NCR and PALGA was in June and December 2017 (tumour registration/data complete up to January 2016). For all other women (*BRCA1/2* and non-*BRCA1/2* mutation carriers), the most recent NCR and PALGA input dates to April and June 2015, respectively (tumour registration/data complete up to January 2012). The most recent data from the BRP were received in December 2016 for *BRCA1/2* mutation carriers with informed consent, and June 2012 for all other women.

## Data handling and missing variables

Four women (*BRCA1/2* mutation carriers,  $n=3/5,980$  (0.05%); non-*BRCA1/2* mutation carriers,  $n=1/8,451$  (0.1%)) were registered as deceased in the HEBON database while the date/age/year of death was unknown. In these cases, the date of death was considered to be between the last live contact and the end of follow-up.

For 2,896 women (*BRCA1/2* mutation carriers,  $n=1,682/5,980$  (28.1%); non-*BRCA1/2* mutation carriers,  $n=1,214/5,980$  (14.4%)), the date of the *BRCA1/2* DNA test was unknown. In these cases the date of a *BRCA1/2* DNA test was considered to be 01-01-1995 (date from which *BRCA1/2* DNA testing became regularly available).

The date/age/year of BC diagnosis was unknown for one *BRCA2* mutation carrier. In the subanalyses where BC was added as censoring event, the first occurring censoring event other than date of BC was used for censoring. For the description of baseline characteristics, BC was considered to have occurred during the observation period.

The date/age/year of OC diagnoses was unknown for two non-*BRCA1/2* mutation carriers. For the description of baseline characteristics, OC diagnoses were considered to have occurred during the observation period.

Data on a history of RRSO were manually curated for all women who developed endometrial cancer (including uterine sarcomas; EC) during follow-up, using the pathology reports (if available) retrieved from PALGA.

Data on whether or not women received hormone treatment (HT) for a specific BC was retrieved by the NCR from medical files, and centrally collected by HEBON. This variable was available for the majority of BCs, but the type and duration of HT was not specified. If a women had both a history of HT-treated BC and a tumour with an unknown HT status (*BRCA1/2* mutation carriers  $n=17$ , non-*BRCA1/2* mutation carriers  $n=8$ ), the date of HT-treated BC was used for all analyses that included HT-status.

## Pathology review and histologic and molecular subgrouping

Pathology reports, hematoxylin and eosin (H&E) stained slides and formalin-fixed paraffin-embedded (FFPE) tumour tissue blocks for ECs of HEBON cohort *BRCA1/2* and non-*BRCA1/2* mutation carriers were

collected via PALGA and centrally reviewed by at least one expert gynaecopathologist to confirm histotype and endometrial origin. All specimens were handled in compliance with the Code of Conduct for dealing responsibly with human tissue in the context of health research (2011) drawn up by the Federation of Dutch Medical Scientific Societies.

### **Assignment of histologic subgroups**

Histologic subtype diagnosis for cases that were available for pathology review were based on The World Health Organization (2014) criteria. Pathology review was primarily based on morphology (H&E slides without immunohistochemical stains), with the exception of high-grade EC without defining features (ambiguous EC). All cases with high-grade histology without defining features/for which histotype was difficult to establish (“ambiguous”) were reviewed by at least two gynaecopathologists. When both agreed that the case was “ambiguous”, *TP53*-mutation status/P53-IHC expression was used for further differentiation. *TP53*-wildtype/p53-wildtype ambiguous carcinomas were considered to be of the “endometrioid” histologic subgroup, and *TP53*-mutant/p53-abnormal ambiguous carcinomas were considered to be of the “serous-like” histologic subgroup. For cases that were not available for revision, histologic subtype and grade were extracted from pathology reports or, if unavailable, from the morphological ICD-0-3.1 code.

After pathology review, ECs were divided in the same histologic subgroups as the comparison group 1: (1) endometrioid (including *TP53*-wildtype/p53-wildtype ambiguous carcinomas), (2) serous-like (including *TP53*-mutant/p53-abnormal ambiguous carcinomas), (3) clear cell carcinoma, (4) sarcoma and (5) other.

Histologic, molecular and clinical characteristics of a subset of ECs in *BRCA1/2* mutation carriers were comprehensively described previously (case-ID; 1-41).<sup>2</sup>

### **Assignment of molecular subgroups**

In the case of the *BRCA1/2* mutation carriers included in the study by de Jonge and colleagues,<sup>2</sup> the UCM-OncoPlus Assay<sup>4</sup> on FFPE-isolated tumour DNA was used for *TP53* mutation analyses. For the ECs in *BRCA1/2* mutation carriers included in this study, but for which mutation analysis failed/was not available ( $n=3$ ), and for the ECs of both *BRCA1/2* mutation carriers (CaseID 42-62) and non-*BRCA1/2* mutation carriers (CaseID 101-140) that were not included in the study by de Jonge and colleagues,<sup>2</sup> p53 immunohistochemistry was used as a surrogate marker to determine *TP53* mutation status. This was either performed manually (clone DO-7, 1:2000, DAKO) as described previously<sup>2</sup> or using the Dako Omnis autostainer (Agilent, Santa Clara,

CA). For the Dako Omnis autostainer, slides were deparaffinized and antigen retrieval was achieved on board using EnVision FLEX High pH Target Retrieval Solution for 30 minutes at 97 °C. Slides were then incubated on board at 32 °C with the following primary antibodies: p53, clone DO-7, Ready-To-Use (Dako) for 25 minutes; PMS2, clone EP51.2, ready-to-use for (Dako) for 25 minutes and MSH6 1:400; clone EPR3945 (Abcam) for 20 minutes. For PMS2, this was followed by incubation with a secondary antibody (EnVision FLEX+ rabbit LINKER) for 10 minutes. EnVision FLEX DAB+ was used as chromogen for 5 minutes, followed by counterstaining of the slides for 6 minutes using Mayer's hematoxylin.

Focal, weak and heterogeneous (not subclonal) nuclear p53 staining was considered as p53 “wild-type”. Diffuse and strong nuclear staining >90% or completely absent nuclear staining “null pattern” (with positive internal control) was considered as p53-abnormal/mutant. In cases where p53 IHC was inconclusive, molecular analysis using next-generation sequencing was performed to determine final *TP53* mutation status ( $n=1$ ). If a EC showed abnormal p53 expression or a *TP53* mutation, additional staining for MMR proteins (PMS2, MSH6) was performed. Expression of MMR proteins was scored in three categories (retained, loss and subclonal/regional loss of protein expression) as described previously reported by Stelloo and colleagues.<sup>5</sup> Tumours in which at least one of the mismatch repair proteins showed loss of expression were considered MMR-deficient (MMRd).

Using these surrogate markers, tumours were subsequently classified in one of the molecular subgroups as previously described:<sup>6-8</sup> (1) p53-abnormal or (2) other (including *POLE*-mutant: only analysed for cases included in the study by de Jonge and colleagues;<sup>2</sup> mismatch repair (MMR)-deficient and no surrogate marker profile group (NSMP)). In case both a *TP53* mutation/abnormal p53 expression and a MMRd phenotype were present (not considering subclonal/regional loss of MMRd), cases were assigned to the “other” group.<sup>6,9</sup>

For cases in which no FFPE block was available for p53 analysis, p53 status was based upon histologic subtype and grade. These were used for classification in the molecular subgroups and subsequent analyses: EEC grade 1/2, adenocarcinoma NOS grade 1/2, EEC/adenocarcinoma NOS grade not specified and clear cell carcinomas were assigned to the *TP53*-wildtype group.<sup>6,10,11</sup> EEC grade 3 and adenocarcinoma NOS grade 3 were considered 50% *TP53* wildtype, 50% *TP53* mutant.<sup>6,12</sup> Uterine serous carcinomas and carcinosarcomas were considered *TP53* mutant.<sup>6,13</sup>





## Supplementary References

1. Heemskerk-Gerritsen BA, Seynaeve C, van Asperen CJ, et al. Breast cancer risk after salpingo-oophorectomy in healthy BRCA1/2 mutation carriers: revisiting the evidence for risk reduction. *J Natl Cancer Inst* 2015;107(5).
2. de Jonge MM, Ritterhouse LL, de Kroon CD, et al. Germline BRCA-associated Endometrial Carcinoma is a Distinct Clinicopathologic Entity. *Clin Cancer Res* 2019;25(24):7517–7526.
3. Casparie M, Tiebosch AT, Burger G, et al. Pathology databanking and biobanking in The Netherlands, a central role for PALGA, the nationwide histopathology and cytopathology data network and archive. *Cell Oncol* 2007;29(1):19–24.
4. Kadri S, Long BC, Mujacic I, et al. Clinical Validation of a Next-Generation Sequencing Genomic Oncology Panel via Cross-Platform Benchmarking against Established Amplicon Sequencing Assays. *J Mol Diagn* 2017;19(1):43–56.
5. Stelloo E, Jansen AML, Osse EM, et al. Practical guidance for mismatch repair-deficiency testing in endometrial cancer. *Ann Oncol* 2017;28(1):96–102.
6. Kandath C, Schultz N, Cherniack AD, et al. Integrated genomic characterization of endometrial carcinoma. *Nature*. 2013;497(7447):67–73.
7. Talhouk A, McConechy MK, Leung S, et al. A clinically applicable molecular-based classification for endometrial cancers. *Br J Cancer* 2015;113(2):299–310.
8. Stelloo E, Bosse T, Nout RA, et al. Refining prognosis and identifying targetable pathways for high-risk endometrial cancer; a TRANSPORTEC initiative. *Mod Pathol* 2015;28(6):836–44.
9. León-Castillo A, de Boer SM, Powell ME et al. Molecular Classification of the PORTEC-3 Trial for High-Risk Endometrial Cancer: Impact on Prognosis and Benefit From Adjuvant Therapy. *J Clin Oncol* 2020;38(29):3388-97.
10. DeLair DF, Burke KA, Selenica P, et al. The genetic landscape of endometrial clear cell carcinomas. *J Pathol* 2017;243(2):230–241.
11. Stelloo E, Nout RA, Osse EM, et al. Improved Risk Assessment by Integrating Molecular and Clinicopathological Factors in Early-stage Endometrial Cancer-Combined Analysis of the PORTEC Cohorts. *Clin Cancer Res* 2016;22(16):4215–24.
12. Bosse T, Nout RA, McAlpine JN, et al. Molecular Classification of Grade 3 Endometrioid Endometrial Cancers Identifies Distinct Prognostic Subgroups. *Am J Surg Pathol* 2018;42(5):561–8.

13. Cherniack AD, Shen H, Walter V, et al. Integrated Molecular Characterization of Uterine Carcinosarcoma. *Cancer cell* 2017;31(3):411–23.



## Supplementary Tables

**Supplementary Table 1. Previously published cohort studies on endometrial cancer risk in *BRCA1/2* mutation carriers**

| Study                                 | Cohort size                                                         | Total years at risk | Mean/median age at enrolment                                      | Mean/median follow-up years            | Path review | Observed (of which tamoxifen exposed)                                                                                                                               | Expected                              | SIR (95% CI, <i>p</i> -value)                                                                                                                                                                                      | EC distribution by <i>BRCA</i> -mutation | Countrie(s) from which the study population was retrieved                                                 |
|---------------------------------------|---------------------------------------------------------------------|---------------------|-------------------------------------------------------------------|----------------------------------------|-------------|---------------------------------------------------------------------------------------------------------------------------------------------------------------------|---------------------------------------|--------------------------------------------------------------------------------------------------------------------------------------------------------------------------------------------------------------------|------------------------------------------|-----------------------------------------------------------------------------------------------------------|
| <b>Beiner et al., 2007</b>            | All: 857<br><i>BRCA1</i> ; 619<br><i>BRCA2</i> ; 236<br>both; 2     | 2787                | 54.4 (range: 45-70)                                               | 3.3 (range: 0.01-9.6)                  | No          | 6 (4) EC<br>6 (4) <i>endometrioid</i>                                                                                                                               | 1.13<br>n.a                           | 5.3 (n.a, <i>p</i> =0.0011) <sup>a</sup>                                                                                                                                                                           | 4x <i>BRCA1</i><br>2x <i>BRCA2</i>       | North America, Europe, and Israel                                                                         |
| <b>Segev et al., 2013</b>             | All: 4456<br><i>BRCA1</i> ; 3536<br><i>BRCA2</i> ; 920              | 25322               | 42.7 (range: n.a.)                                                | 5.7 (range: n.a.)                      | No          | 17 (8) EC                                                                                                                                                           | 9.06                                  | 1.87 (1.13-2.94, <i>p</i> =0.01) <sup>b</sup>                                                                                                                                                                      | 13x <i>BRCA1</i><br>4x <i>BRCA2</i>      | Canada, Italy, USA, Austria, Poland, Norway                                                               |
| <b>Reitsma et al., 2013</b>           | All: 315<br><i>BRCA1</i> ; 201<br><i>BRCA2</i> ; 114                | 2062                | 43 (range: 30–71)                                                 | 6 (range: 0-27)                        | No          | 2 (0) EC<br>2 (0) <i>endometrioid</i>                                                                                                                               | 0.94<br>n.a                           | 2.13 (0.24-7.69, <i>p</i> =0.27)                                                                                                                                                                                   | 1x <i>BRCA1</i><br>1x <i>BRCA2</i>       | The Netherlands                                                                                           |
| <b>Shu et al., 2016</b>               | All: 1083<br><i>BRCA1</i> ; 627<br><i>BRCA2</i> ; 453<br>both; 3    | 6377                | 45.6 (IQR: 40.9-52.5)                                             | 5.1 (IQR: 3.0-8.4)                     | Partly      | 8 (5) EC<br>2 (2) <i>endometrioid</i><br>5 (3) <i>serous(-like)</i><br>1 (0) <i>sarcoma</i>                                                                         | 4.30<br>3.62<br>0.34<br>0.14          | 1.9 (0.8-3.7, <i>p</i> =0.09)<br>0.6 (0.1-2.0, <i>p</i> =0.88)<br>14.8 (4.8-34.6, <i>p</i> <0.001) <sup>c</sup><br>7.1 (0.2-39.4, <i>p</i> =0.13)                                                                  | 5x <i>BRCA1</i><br>3x <i>BRCA2</i>       | USA and United Kingdom                                                                                    |
| <b>Lee et al., 2017</b>               | All: 828<br><i>BRCA1</i> ; 438<br><i>BRCA2</i> ; 390                | n.a.                | 43 (IQR: 34-52)                                                   | 9 (IQR: n.a.)                          | No          | 5 (3) EC<br>5 (3) <i>endometrioid</i>                                                                                                                               | 2.04<br>n.a                           | 2.45 (0.80-5.72, <i>p</i> =0.11)                                                                                                                                                                                   | 3x <i>BRCA1</i><br>2x <i>BRCA2</i>       | Australia and New Zealand                                                                                 |
| <b>Saule et al., 2018</b>             | All: 369<br><i>BRCA1</i> ; 238<br><i>BRCA2</i> ; 131                | 1779                | <i>BRCA1</i> :47.22 (IQ: 1.29)<br><i>BRCA2</i> : 52.75 (IQ: 6.83) | n.a. <sup>d</sup><br>n.a. <sup>d</sup> | Yes         | 2 (0) EC<br>2 (0) <i>serous</i>                                                                                                                                     | 0.62<br>0.062                         | "not increased", <i>p</i> =0.26<br>32.2 (11.5-116.4, <i>p</i> <0.001)                                                                                                                                              | 2x <i>BRCA1</i><br>0x <i>BRCA2</i>       | France                                                                                                    |
| <b>Laitman et al., 2019</b>           | All: 2627<br><i>BRCA1</i> ; 1463<br><i>BRCA2</i> ; 1154<br>both; 10 | 32774               | n.a.                                                              | n.a.                                   | No          | 14 (2 <sup>e</sup> ) EC<br>5 (°) <i>endometrioid</i><br>5 (1) <i>serous(-like)</i><br>4 (1) <i>sarcoma</i>                                                          | 3.52<br>n.a<br>0.35<br>0.106          | 3.98 (2.174-6.673, <i>p</i> <0.001)<br>n.a.<br>14.29 (4.639-33.34, <i>p</i> <0.001)<br>37.74 (10.28-96.62, <i>p</i> <0.001)                                                                                        | 10x <i>BRCA1</i><br>4x <i>BRCA2</i>      | Israel, mainly includes founder mutations; ( <i>BRCA1</i> ; 185delAG & 5382insC, <i>BRCA2</i> ; 6174delT) |
| <b>Kitson et al., 2020</b>            | All: 2609<br><i>BRCA1</i> ; 1350<br><i>BRCA2</i> ; 1259             | 59199               | 20.0 (IQR: 20.0-31.6)                                             | 23.8 (IQR: n.a.)                       | Partly      | 14 (3 <sup>f</sup> ) EC<br>7 (2 <sup>f</sup> ) <i>endometrioid</i><br>3 (1 <sup>f</sup> ) <i>serous-like</i><br>4 (0 <sup>f</sup> ) <i>unknown</i>                  | 8.22<br>n.a.<br>0.82<br>n.a.          | 1.70 (0.74-3.33, <i>p</i> =n.a.)<br>n.a.<br>3.66 (0.01-23.41, <i>p</i> =n.a.)<br>n.a.                                                                                                                              | 7x <i>BRCA1</i><br>7x <i>BRCA2</i>       | United Kingdom                                                                                            |
| <b>de Jonge et al., current study</b> | All: 5980<br><i>BRCA1</i> ; 3788<br><i>BRCA2</i> ; 2151<br>both; 41 | 119296              | 27.4 (IQR: 25.0-37.8)                                             | 22.5 (IQR: 15.2-27.0)                  | Partly      | 58 (8 <sup>g</sup> ) EC<br>35 (3 <sup>g</sup> ) <i>endometrioid</i><br>19 (5 <sup>g</sup> ) <i>serous(-like)</i><br>3 (0) <i>sarcoma</i><br>1 (0) <i>clear cell</i> | 20.53<br>16.85<br>1.95<br>1.3<br>0.29 | 2.83 (2.2-3.7), <i>p</i> <0.001 <sup>h</sup><br>2.07 (1.5-2.9), <i>p</i> <0.001 <sup>h</sup><br>9.77 (6.2-15.3), <i>p</i> <0.001 <sup>h</sup><br>2.30 (0.7-7.1), <i>p</i> =0.14<br>3.40 (0.5-24.1), <i>p</i> =0.25 | 44x <i>BRCA1</i><br>14x <i>BRCA2</i>     | The Netherlands                                                                                           |

<sup>a</sup>SIR only including non-tamoxifen exposed women; 2.7 (95% CI: n.a., *p*=0.17). <sup>b</sup>SIR only including non-tamoxifen exposed women; 1.67 (95% CI: 0.81-3.07, *p*=0.1). <sup>c</sup>SIR (serous-like) only including non-tamoxifen exposed women; 11.3 (95% CI: 1.4-40.8, *p*=0.01). <sup>d</sup>Age at end follow-up was given instead of follow-up years; *BRCA1*: 52.75 (IQR: 6.83), *BRCA2*: 56.51 (IQR: 0.8). <sup>e</sup>For 2/5 endometrioid EC, tamoxifen-exposure status was unknown, <sup>f</sup>History of tamoxifen-use was unknown for 4 cases; 1 with endometrioid histology, 2 with serous-like histology and 1 with unknown histology <sup>g</sup>Type and duration of hormone treatment not available. <sup>h</sup>For hazard ratios when additionally censoring for hormone-treated breast cancer, see Table 4.

**Supplementary Table 2. Description of morphological ICD-0-3.1 codes assigned to the different histologic subgroups**

| Endometrioid (includes mucinous)                   | ICD-0 code | Serous/serous-like                  | ICD-0 code | Clear cell                     | ICD-0 code | Sarcoma                                        | ICD-0 code | Other                                                     | ICD-0 code |
|----------------------------------------------------|------------|-------------------------------------|------------|--------------------------------|------------|------------------------------------------------|------------|-----------------------------------------------------------|------------|
| Endometrioid adenocarcinoma, NOS                   | 8380       | Serous cystadenocarcinoma, NOS      | 8441       | Clear cell adenocarcinoma, NOS | 8310       | Endometrial stromal sarcoma, NOS               | 8930       | Neoplasm, malignant                                       | 8000       |
| Endometrioid adenocarcinoma, secretory variant     | 8382       | Papillary adenocarcinoma, NOS       | 8260       |                                |            | Endometrial stromal sarcoma, low grade         | 8931       | Tumour cells, malignant                                   | 8001       |
| Endometrioid adenocarcinoma, ciliated cell variant | 8383       | Serous surface papillary carcinoma  | 8461       |                                |            | Leiomyosarcoma, NOS                            | 8890       | Carcinoma, undifferentiated, NOS                          | 8020       |
| Adenocarcinoma with squamous metaplasia            | 8570       | Papillary serous cystadenocarcinoma | 8460       |                                |            | Epithelioid leiomyosarcoma                     | 8891       | Large cell carcinoma, NOS                                 | 8012       |
| Adenosquamous carcinoma                            | 8560       | Cystadenocarcinoma                  | 8440       |                                |            | Myxoid leiomyosarcoma                          | 8896       | Large cell neuroendocrine carcinoma                       | 8013       |
| Adenocarcinoma with spindle cell metaplasia        | 8572       | Mesodermal mixed tumour             | 8951       |                                |            | Rhabdomyosarcoma, NOS                          | 8900       | Large cell carcinoma with rhabdoid phenotype              | 8014       |
| Adenocarcinoma with apocrine metaplasia            | 8573       | Carcinosarcoma, NOS                 | 8980       |                                |            | Myosarcoma                                     | 8895       | Glassy cell carcinoma                                     | 8015       |
| Mucin-producing adenocarcinoma                     | 8481       | Mullerian mixed tumour              | 8950       |                                |            | Pleomorphic rhabdomyosarcoma, adult type       | 8901       | Giant cell carcinoma                                      | 8031       |
| Villous adenocarcinoma                             | 8262       | Metaplastic carcinoma, NOS          | 8575       |                                |            | Mixed type rhabdomyosarcoma                    | 8902       | Pseudosarcomatous carcinoma                               | 8033       |
| Adenocarcinoma, NOS                                | 8140       | Carcinofibroma                      | 8934       |                                |            | Embryonal rhabdomyosarcoma, NOS                | 8910       | Small cell carcinoma, NOS                                 | 8041       |
| Carcinoma, NOS                                     | 8010       | Adenocarcinoma with mixed subtypes  | 8255       |                                |            | Alveolar rhabdomyosarcoma                      | 8920       | Combined small cell carcinoma                             | 8045       |
| Solid carcinoma, NOS                               | 8230       | Mixed cell adenocarcinoma           | 8323       |                                |            | Sarcoma, NOS                                   | 8800       | Non-small cell carcinoma                                  | 8046       |
| Adenocarcinoma in adenomatous polyp                | 8210       |                                     |            |                                |            | Spindle cell sarcoma                           | 8801       | Squamous cell carcinoma, NOS                              | 8070       |
| Adenocarcinoma in villous adenoma                  | 8261       |                                     |            |                                |            | Giant cell sarcoma (except of bone M-9250/3)   | 8802       | Squamous cell carcinoma, keratinizing, NOS                | 8071       |
| Adenocarcinoma in tubulovillous adenoma            | 8263       |                                     |            |                                |            | Small cell sarcoma                             | 8803       | Squamous cell carcinoma, large cell, nonkeratinizing, NOS | 8072       |
| Endometrioid adenofibroma, malignant               | 8381       |                                     |            |                                |            | Undifferentiated sarcoma                       | 8805       | Squamous cell carcinoma, spindle cell                     | 8074       |
| Mucinous adenocarcinoma                            | 8480       |                                     |            |                                |            | Fibrosarcoma, NOS                              | 8810       | Basaloid squamous cell carcinoma                          | 8083       |
|                                                    |            |                                     |            |                                |            | Malignant fibrous histiocytoma                 | 8830       | Squamous cell carcinoma, clear cell type                  | 8084       |
|                                                    |            |                                     |            |                                |            | Malignant perivascular epithelioid cell tumour | 8714       | Transitional cell carcinoma                               | 8120       |
|                                                    |            |                                     |            |                                |            | Adenosarcoma                                   | 8933       | Scirrhous adenocarcinoma                                  | 8141       |
|                                                    |            |                                     |            |                                |            | Stromal sarcoma, NOS                           | 8935       | Superficial spreading adenocarcinoma                      | 8143       |
|                                                    |            |                                     |            |                                |            | Mesenchymoma, malignant                        | 8990       | Adenoid cystic carcinoma                                  | 8200       |
|                                                    |            |                                     |            |                                |            | Synovial sarcoma, NOS                          | 9040       | Cribriiform carcinoma, NOS                                | 8201       |
|                                                    |            |                                     |            |                                |            | Haemangiosarcoma                               | 9120       | Tubular adenocarcinoma                                    | 8211       |
|                                                    |            |                                     |            |                                |            | Chondrosarcoma, NOS                            | 9220       | Carcinoid tumour, NOS                                     | 8240       |
|                                                    |            |                                     |            |                                |            | Ewing sarcoma                                  | 9260       | Mixed adenoneuroendocrine carcinoma                       | 8244       |
|                                                    |            |                                     |            |                                |            |                                                |            | Neuroendocrine carcinoma, NOS                             | 8246       |
|                                                    |            |                                     |            |                                |            |                                                |            | Acidophil carcinoma                                       | 8280       |
|                                                    |            |                                     |            |                                |            |                                                |            | Clear cell adenocarcinofibroma                            | 8313       |

|                                                    |      |
|----------------------------------------------------|------|
| Granular cell carcinoma                            | 8320 |
| Follicular adenocarcinoma, NOS (C73.9)             | 8330 |
| Adenocarcinoma, endocervical type                  | 8384 |
| Papillary cystadenocarcinoma, NOS                  | 8450 |
| Papillary mucinous cystadenocarcinoma              | 8471 |
| Mucinous adenocarcinoma, endocervical type         | 8482 |
| Signet ring cell carcinoma                         | 8490 |
| Adenocarcinoma with neuroendocrine differentiation | 8574 |
| Mesonephroma, malignant                            | 9110 |
| Peripheral neuroectodermal tumour                  | 9364 |
| Malignant peripheral nerve sheath tumour           | 9540 |
| No microscopic confirmation                        | 9990 |

**Supplementary Table 3. Number of person-years at risk and number of events per 5-year age category for *BRCA1/2* mutation carriers and non-*BRCA1/2* mutation carriers**

| Age category | <i>BRCA1/2</i> carriers       |                               |              |             |          | non- <i>BRCA1/2</i> carriers  |                                |              |                     |
|--------------|-------------------------------|-------------------------------|--------------|-------------|----------|-------------------------------|--------------------------------|--------------|---------------------|
|              | Person-years at risk, No. (%) | All ECs <sup>a</sup> , No (%) | Endometrioid | Serous-like | Sarcoma  | Person-years at risk, No. (%) | All ECs <sup>b</sup> , No. (%) | Endometrioid | Serous-like No. (%) |
| 25-29        | 14643 (12.3)                  | 0 (0.0)                       | 0 (0.0)      | 0 (0.0)     | 0 (0.0)  | 19663 (12.2)                  | 1 (3.0)                        | 1 (3.3)      | 0 (0.0)             |
| 30-34        | 17091 (14.3)                  | 2 (3.4)                       | 1 (2.9)      | 0 (0.0)     | 1 (33.3) | 23376 (14.5)                  | 0 (0.0)                        | 0 (0.0)      | 0 (0.0)             |
| 35-39        | 17990 (15.1)                  | 2 (3.4)                       | 2 (5.7)      | 0 (0.0)     | 0 (0.0)  | 24984 (15.5)                  | 1 (3.0)                        | 1 (3.3)      | 0 (0.0)             |
| 40-44        | 17408 (14.6)                  | 2 (3.4)                       | 2 (5.7)      | 0 (0.0)     | 0 (0.0)  | 24303 (15.1)                  | 0 (0.0)                        | 0 (0.0)      | 0 (0.0)             |
| 45-49        | 15435 (12.9)                  | 7 (12.1)                      | 4 (11.4)     | 3 (15.8)    | 0 (0.0)  | 21314 (13.3)                  | 4 (12.1)                       | 4 (1.3)      | 0 (0.0)             |
| 50-54        | 12578 (10.5)                  | 7 (12.1)                      | 5 (14.2)     | 0 (0.0)     | 2 (66.7) | 16704 (10.4)                  | 9 (27.3)                       | 8 (26.7)     | 1 (33.3)            |
| 55-59        | 9306 (7.8)                    | 9 (15.5)                      | 5 (14.2)     | 3 (15.8)    | 0 (0.0)  | 12133 (7.5)                   | 5 (15.2)                       | 5 (16.7)     | 0 (0.0)             |
| 60-64        | 6377 (5.3)                    | 11 (19.0)                     | 6 (14.2)     | 5 (26.3)    | 0 (0.0)  | 8124 (5.1)                    | 6 (18.2)                       | 6 (0.2)      | 0 (0.0)             |
| 65-69        | 4052 (3.4)                    | 14 (24.1)                     | 7 (20.0)     | 7 (36.8)    | 0 (0.0)  | 4580 (2.8)                    | 3 (9.1)                        | 3 (10.0)     | 0 (0.0)             |
| 70-74        | 2355 (2.0)                    | 3 (5.2)                       | 2 (5.7)      | 1 (5.3)     | 0 (0.0)  | 2709 (1.7)                    | 3 (9.1)                        | 2 (6.7)      | 1 (33.)             |
| 75-79        | 1225 (1.0)                    | 0 (0.0)                       | 0 (0.0)      | 0 (0.0)     | 0 (0.0)  | 1593 (1.0)                    | 1 (3.0)                        | 0 (0.0)      | 1 (33.3)            |
| 80-84        | 558 (0.5)                     | 0 (0.0)                       | 0 (0.0)      | 0 (0.0)     | 0 (0.0)  | 826 (0.5)                     | 0 (0.0)                        | 0 (0.0)      | 0 (0.0)             |
| 85-89        | 219 (0.2)                     | 1 (1.7)                       | 1 (2.9)      | 0 (0.0)     | 0 (0.0)  | 382 (0.2)                     | 0 (0.0)                        | 0 (0.0)      | 0 (0.0)             |
| 90-94        | 42 (0.0)                      | 0 (0.0)                       | 0 (0.0)      | 0 (0.0)     | 0 (0.0)  | 121 (0.1)                     | 0 (0.0)                        | 0 (0.0)      | 0 (0.0)             |
| 95+          | 16 (0.0)                      | 0 (0.0)                       | 0 (0.0)      | 0 (0.0)     | 0 (0.0)  | 27 (0.0)                      | 0 (0.0)                        | 0 (0.0)      | 0 (0.0)             |

<sup>a</sup>One clear cell carcinoma occurred at age 59 years, this tumour is not separately mentioned in the columns. <sup>b</sup>None of the non-*BRCA1/2* mutation carriers developed a sarcoma or clear cell carcinoma during follow-up.

Abbreviations; EC: Endometrial Cancer

**Supplementary Table 4. Details on the included endometrial cancers in the cohort**

|                                                        | <b>BRCA carriers</b> | <b>Non-BRCA carriers</b> | <b>p value<sup>a</sup></b> |
|--------------------------------------------------------|----------------------|--------------------------|----------------------------|
| Endometrial cancer, No. (%)                            | 58 (100)             | 33 (100)                 |                            |
| Median age at diagnoses, yrs (range)                   | 60.2 (33.1-85.4)     | 57.4 (29.7-79.8)         | 0.49                       |
| Histotype (after review)                               |                      |                          |                            |
| Endometrioid                                           |                      |                          |                            |
| <i>grade 1, No. (%)</i>                                | 18 (31.0)            | 14 (42.4)                |                            |
| <i>grade 2, No. (%)</i>                                | 3 (5.2)              | 2 (6.1)                  |                            |
| <i>grade 3, No. (%)</i>                                | 6 (10.3)             | 1 (3.0)                  |                            |
| Mucinous, No. (%)                                      | 1 (1.7)              | 0 (0)                    |                            |
| Serous, No. (%)                                        | 9 (15.5)             | 1 (3.0)                  |                            |
| Carcinosarcoma, No. (%)                                | 4 (6.9)              | 2 (6.1)                  |                            |
| Ambiguous, No. (%)                                     | 6 (10.3)             | 0 (0)                    |                            |
| Low grade endometrial stromal sarcoma, No. (%)         | 1 (1.7)              | 0 (0)                    |                            |
| Leiomyosarcoma, No. (%)                                | 1 (1.7)              | 0 (0)                    |                            |
| Adenosarcoma, No. (%)                                  | 1 (1.7)              | 0 (0)                    |                            |
| Not reviewed, No. (%)                                  | 8 (13.8)             | 13 (39.4)                |                            |
| Histologic groups                                      |                      |                          | 0.02                       |
| Endometrioid, No. (%)                                  | 35 (60.3)            | 30 (90.9)                |                            |
| Serous/Serous-like <sup>b</sup> , No. (%)              | 19 (32.8)            | 3 (9.1)                  |                            |
| Sarcoma, No. (%)                                       | 3 (5.2)              | 0 (0)                    |                            |
| Clear cell, No. (%)                                    | 1 (1.7)              | 0 (0)                    |                            |
| Other, No. (%)                                         | 0 (0)                | 0 (0)                    |                            |
| Occurrence EC                                          |                      |                          |                            |
| After <i>BRCA1/2</i> DNA test, No. (%)                 | 28 (48.3)            | 7 (21.2)                 |                            |
| Before <i>BRCA1/2</i> DNA test, No. (%)                | 20 (34.5)            | 22 (66.7)                |                            |
| Date <i>BRCA1/2</i> DNA test unknown, No. (%)          | 10 (17.2)            | 4 (12.1)                 |                            |
| Pathology review                                       |                      |                          | 0.01                       |
| Available, No. (%)                                     | 50 (86.2)            | 20 (60.6)                |                            |
| Not available, No. (%)                                 | 8 (13.8)             | 13 (39.4)                |                            |
| Histologic group change after review                   |                      |                          | 0.0102                     |
| Yes, No. (%)                                           | 11 (19.0)            | 0 (0.0)                  |                            |
| No, No. (%)                                            | 39 (67.2)            | 20 (60.6)                |                            |
| Not reviewed, No. (%)                                  | 8 (13.8)             | 13 (39.4)                |                            |
| p53-abnormal, including cases not available for review |                      |                          | <0.001                     |
| Yes, No. (%)                                           | 27 (46.6)            | 3 (9.1)                  |                            |
| No, No. (%)                                            | 31 (53.4)            | 30 (90.9)                |                            |
| P53-abnormal, excluding cases not available for review |                      |                          | <0.001                     |
| Yes, No. (%)                                           | 27 (46.6)            | 2 (6.1)                  |                            |
| No, No. (%)                                            | 23 (39.7)            | 17 (51.5)                |                            |
| Not available, No. (%)                                 | 8 (13.8)             | 14 (42.4)                |                            |
| P53-status based on;                                   |                      |                          | <0.001                     |
| Mutation analyses, No. (%)                             | 37 (63.8)            | 0 (0.0)                  |                            |
| IHC, No. (%)                                           | 13 (22.4)            | 19 (57.6)                |                            |
| Histotype, No. (%)                                     | 8 (13.8)             | 14 (42.4)                |                            |

Abbreviations: EC: Endometrial cancer, IHC: immunohistochemistry

<sup>a</sup>p values were calculated using the Chi-square test (categorical variables) and the Mann-Whitney U-test (numerical variables). <sup>b</sup>Includes six carcinomas of ambiguous morphology that were classified as serous-like based on p53-status.

**Supplementary Table 5. Characteristics of endometrial cancers that occurred in the *BRCA1/2* mutation carrier cohort**

| Case ID <sup>a</sup> | Final histological subgroup <sup>b</sup> | BRCA mutation | Year | Age | Original Diagnoses        | Diagnoses after pathology review | P53-status <sup>c</sup>        | Category change histologic subgroup after review | Molecular subgroup | RRSO, years in between RRSO-EC | Adnexal involvement/ (history of) ovarian malignancy | Adnexal specimens available for revision | Hysterectomy with/without adnexae                                                                         |
|----------------------|------------------------------------------|---------------|------|-----|---------------------------|----------------------------------|--------------------------------|--------------------------------------------------|--------------------|--------------------------------|------------------------------------------------------|------------------------------------------|-----------------------------------------------------------------------------------------------------------|
| 1                    | endometrioid                             | BRCA1         | 2011 | 63  | EEC gr1                   | EEC gr1                          | wildtype <sup>d</sup>          | No                                               | Other              | No                             | No                                                   | Yes                                      | Hysterectomy, adnexae removed shortly before (RRSO with EC diagnoses in concurrently performed curettage) |
| 2                    | endometrioid                             | BRCA1         | 2005 | 55  | EEC gr2                   | EEC gr1                          | wildtype <sup>d</sup>          | No                                               | Other              | Yes, 5.1                       | No                                                   | No                                       | Hysterectomy without adnexae (history RRSO)                                                               |
| 3                    | endometrioid                             | BRCA1         | 2013 | 70  | EEC gr3                   | EEC gr3                          | mutant <sup>d</sup>            | No                                               | p53-abnormal       | Yes, 15.6                      | No                                                   | Yes                                      | Hysterectomy without adnexae (history RRSO)                                                               |
| 11                   | endometrioid                             | BRCA1         | 2004 | 63  | adenocarcinoma NOS, gr1   | EEC gr1                          | wildtype <sup>d</sup>          | No                                               | Other              | No                             | No                                                   | Yes                                      | Hysterectomy with adnexae                                                                                 |
| 13                   | endometrioid                             | BRCA1         | 2004 | 50  | EEC gr1                   | EEC gr1                          | wildtype <sup>d</sup>          | No                                               | Other              | No                             | No                                                   | Yes                                      | Hysterectomy with adnexae                                                                                 |
| 15                   | endometrioid                             | BRCA1         | 2009 | 74  | EEC gr3                   | EEC gr3                          | mutant <sup>d</sup>            | No                                               | p53-abnormal       | No                             | No                                                   | No, not removed                          | Hysterectomy without adnexae                                                                              |
| 17                   | endometrioid                             | BRCA1         | 2013 | 65  | EEC gr3                   | EEC gr3                          | mutant <sup>d</sup>            | No                                               | p53-abnormal       | Yes, 9.0                       | No                                                   | Yes                                      | Hysterectomy without adnexae (history RRSO)                                                               |
| 18                   | endometrioid                             | BRCA1         | 2005 | 59  | EEC gr1                   | EEC gr1                          | wildtype <sup>d</sup>          | No                                               | Other              | No                             | No                                                   | Yes                                      | Hysterectomy with adnexae                                                                                 |
| 19                   | endometrioid                             | BRCA1         | 1997 | 46  | EEC gr2                   | EEC gr1                          | wildtype <sup>d</sup>          | No                                               | Other              | No                             | No                                                   | Yes                                      | Hysterectomy, adnexae removed shortly before                                                              |
| 20                   | endometrioid                             | BRCA1         | 2011 | 49  | EEC gr2                   | EEC gr3                          | mutant <sup>d</sup>            | No                                               | p53-abnormal       | Yes, 9.5                       | No                                                   | Yes                                      | Hysterectomy without adnexae (history RRSO)                                                               |
| 21                   | endometrioid                             | BRCA1         | 2013 | 65  | EEC gr2                   | EEC gr2                          | mutant <sup>d</sup>            | No                                               | p53-abnormal       | Yes, 11.6                      | No                                                   | Yes                                      | Hysterectomy without adnexae (history RRSO)                                                               |
| 23                   | endometrioid                             | BRCA1         | 2011 | 53  | mucinous                  | mucinous                         | wildtype <sup>d</sup>          | No                                               | Other              | Yes, 6.1                       | No                                                   | Yes                                      | Hysterectomy without adnexae (history RRSO)                                                               |
| 28                   | endometrioid                             | BRCA1         | 2002 | 44  | EEC gr1                   | EEC gr1                          | wildtype <sup>d</sup>          | No                                               | Other              | Yes, 0.4                       | No                                                   | Yes                                      | Hysterectomy without adnexae (history RRSO)                                                               |
| 30                   | endometrioid                             | BRCA1         | 2012 | 39  | EEC gr2                   | n.a.                             | n.a., considered TP53 wildtype | n.a.                                             | Other <sup>e</sup> | No                             | No                                                   | No, unknown if removed                   | Unknown                                                                                                   |
| 33                   | endometrioid                             | BRCA1         | 2000 | 49  | EEC gr2                   | EEC gr1                          | wildtype <sup>d</sup>          | No                                               | Other              | No                             | No                                                   | Yes                                      | Hysterectomy with adnexae                                                                                 |
| 34                   | endometrioid                             | BRCA1         | 2005 | 54  | adenocarcinoma NOS, gr2   | EEC gr2                          | mutant <sup>d</sup>            | No                                               | p53-abnormal       | No <sup>g</sup>                | No                                                   | Yes                                      | Hysterectomy with fallopian tubes                                                                         |
| 35                   | endometrioid                             | BRCA1         | 2000 | 49  | EEC gr1                   | EEC gr1                          | wildtype <sup>d</sup>          | No                                               | Other              | No                             | No                                                   | Yes                                      | Hysterectomy with adnexae                                                                                 |
| 37                   | endometrioid                             | BRCA1         | 2014 | 33  | EEC gr2-3                 | EEC gr2                          | mutant <sup>d</sup>            | No                                               | p53-abnormal       | Yes, 5.1                       | No                                                   | Yes                                      | Hysterectomy without adnexae (history RRSO)                                                               |
| 38                   | endometrioid                             | BRCA1         | 2010 | 56  | EEC gr1                   | EEC gr1                          | wildtype <sup>d</sup>          | No                                               | Other              | Yes <sup>h</sup> , 4.8         | History ovarian clear cell carcinoma                 | Yes                                      | Hysterectomy without adnexae (history ovariectomy)                                                        |
| 41                   | endometrioid                             | BRCA1         | 2007 | 50  | EEC gr2                   | EEC gr1                          | wildtype <sup>d</sup>          | No                                               | Other              | Yes, 0.6                       | No                                                   | Yes                                      | Hysterectomy without adnexae (history RRSO)                                                               |
| 47                   | endometrioid                             | BRCA1         | 1999 | 58  | adenocarcinoma NOS, gr1-2 | EEC gr1                          | wildtype                       | No                                               | Other              | No                             | Simultaneous bilateral HGSO                          | Yes                                      | Hysterectomy with adnexae                                                                                 |

|    |              |       |      |    |                           |                           |                                |      |                    |           |                                                       |                        |                                              |
|----|--------------|-------|------|----|---------------------------|---------------------------|--------------------------------|------|--------------------|-----------|-------------------------------------------------------|------------------------|----------------------------------------------|
| 50 | endometrioid | BRCA1 | 2006 | 85 | EEC gr3                   | EEC gr3                   | mutant <sup>d</sup>            | No   | p53-abnormal       | No        | No                                                    | No                     | Hysterectomy with adnexae                    |
| 51 | endometrioid | BRCA1 | 1996 | 69 | EEC gr3                   | EEC gr3                   | mutant                         | No   | p53-abnormal       | No        | No                                                    | Yes                    | Hysterectomy with adnexae                    |
| 56 | endometrioid | BRCA1 | 2007 | 63 | EEC gr1                   | n.a.                      | n.a., considered TP53 wildtype | n.a. | Other <sup>e</sup> | No        | Simultaneous HGSOC left side, right side not reported | No                     | Hysterectomy with adnexae                    |
| 60 | endometrioid | BRCA1 | 1994 | 57 | adenocarcinoma NOS gr1    | n.a.                      | n.a., considered TP53 wildtype | n.a. | Other <sup>e</sup> | No        | No                                                    | No, unknown if removed | Unknown                                      |
| 61 | endometrioid | BRCA1 | 2006 | 68 | EEC, gr not specified     | n.a.                      | n.a., considered TP53 wildtype | n.a. | Other <sup>e</sup> | No        | Simultaneous HGSOC right side, left side not involved | No                     | Hysterectomy with adnexae                    |
| 62 | endometrioid | BRCA1 | 2008 | 40 | EEC gr1                   | n.a.                      | n.a., considered TP53 wildtype | n.a. | Other <sup>e</sup> | No        | No                                                    | No                     | Hysterectomy with adnexae                    |
| 4  | endometrioid | BRCA2 | 2015 | 64 | EEC gr1                   | EEC gr1                   | mutant <sup>d</sup>            | No   | Other <sup>f</sup> | Yes, 6.9  | No                                                    | Yes                    | Hysterectomy without adnexae (history RRSO)  |
| 12 | endometrioid | BRCA2 | 2004 | 62 | EEC gr2                   | EEC gr1                   | wildtype <sup>d</sup>          | No   | Other              | Yes, 1.0  | No                                                    | Yes                    | Hysterectomy without adnexae (history RRSO)  |
| 24 | endometrioid | BRCA2 | 2011 | 67 | EEC gr2                   | EEC gr1                   | wildtype <sup>d</sup>          | No   | Other              | No        | No                                                    | Yes                    | Hysterectomy with adnexae                    |
| 27 | endometrioid | BRCA2 | 2009 | 61 | EEC gr1                   | EEC gr1                   | wildtype <sup>d</sup>          | No   | Other              | No        | No                                                    | Yes                    | Hysterectomy with adnexae                    |
| 31 | endometrioid | BRCA2 | 2011 | 50 | EEC gr2                   | EEC gr1                   | wildtype <sup>d</sup>          | No   | Other              | No        | Simultaneous bilateral EOC                            | Yes                    | Hysterectomy, adnexae removed shortly before |
| 45 | endometrioid | BRCA2 | 1989 | 65 | adenocarcinoma NOS, gr1   | n.a.                      | n.a., considered TP53 wildtype | n.a. | Other <sup>e</sup> | No        | No                                                    | No                     | Hysterectomy with adnexae                    |
| 52 | endometrioid | BRCA2 | 2001 | 67 | EEC gr2                   | EEC gr1                   | wildtype                       | No   | Other              | No        | No                                                    | Yes                    | Hysterectomy with adnexae                    |
| 58 | endometrioid | BRCA2 | 2009 | 38 | EEC gr1                   | n.a.                      | n.a., considered TP53 wildtype | n.a. | Other <sup>e</sup> | yes, 5.0  | No                                                    | No, unknown if removed | Unknown                                      |
| 5  | serous-like  | BRCA1 | 2015 | 68 | serous                    | ambiguous                 | mutant <sup>d</sup>            | No   | p53-abnormal       | Yes, 9.4  | No                                                    | Yes                    | Hysterectomy without adnexae (history RRSO)  |
| 6  | serous-like  | BRCA1 | 2008 | 64 | EEC gr3                   | serous                    | mutant <sup>d</sup>            | Yes  | p53-abnormal       | No        | No                                                    | Yes                    | Hysterectomy with adnexae                    |
| 7  | serous-like  | BRCA1 | 2010 | 65 | EEC gr1                   | ambiguous                 | mutant <sup>d</sup>            | Yes  | p53-abnormal       | Yes, 11.7 | No                                                    | Yes                    | Hysterectomy without adnexae (history RRSO)  |
| 8  | serous-like  | BRCA1 | 2009 | 65 | EEC gr3                   | ambiguous                 | mutant <sup>d</sup>            | Yes  | p53-abnormal       | Yes, 7.4  | No                                                    | Yes                    | Hysterectomy without adnexae (history RRSO)  |
| 14 | serous-like  | BRCA1 | 2000 | 49 | carcinosarcoma            | carcinosarcoma, serous    | mutant <sup>d</sup>            | No   | p53-abnormal       | No        | No                                                    | Yes                    | Hysterectomy with adnexae                    |
| 16 | serous-like  | BRCA1 | 1996 | 59 | adenocarcinoma NOS, gr2-3 | serous                    | mutant <sup>d</sup>            | Yes  | p53-abnormal       | No        | No                                                    | Yes                    | Hysterectomy with adnexae                    |
| 22 | serous-like  | BRCA1 | 2015 | 63 | carcinosarcoma, serous    | carcinosarcoma, ambiguous | mutant <sup>d</sup>            | No   | Other <sup>f</sup> | Yes, 4.7  | No                                                    | Yes                    | Hysterectomy without adnexae (history RRSO)  |
| 26 | serous-like  | BRCA1 | 2012 | 49 | EEC gr3                   | carcinosarcoma, ambiguous | mutant <sup>d</sup>            | Yes  | p53-abnormal       | Yes, 4.0  | No                                                    | Yes                    | Hysterectomy without adnexae (history RRSO)  |
| 39 | serous-like  | BRCA1 | 2003 | 65 | EEC gr2                   | ambiguous                 | mutant <sup>d</sup>            | Yes  | p53-abnormal       | Yes       | No                                                    | Yes                    | Hysterectomy without adnexae (history RRSO)  |
| 40 | serous-like  | BRCA1 | 2006 | 58 | EEC gr3                   | serous                    | mutant <sup>d</sup>            | Yes  | p53-abnormal       | Yes, 6.8  | No                                                    | Yes                    | Hysterectomy without adnexae (history RRSO)  |
| 43 | serous-like  | BRCA1 | 2006 | 60 | serous                    | serous                    | mutant                         | No   | p53-abnormal       | No        | No                                                    | Yes                    | Hysterectomy with adnexae                    |

|                                                                                     |              |       |      |    |                             |                        |                                |      |                    |                           |         |                                 |                                                                                                                |
|-------------------------------------------------------------------------------------|--------------|-------|------|----|-----------------------------|------------------------|--------------------------------|------|--------------------|---------------------------|---------|---------------------------------|----------------------------------------------------------------------------------------------------------------|
| 44                                                                                  | serous-like  | BRCA1 | 2001 | 73 | adenocarcinoma NOS, gr3     | serous                 | mutant                         | Yes  | p53-abnormal       | No                        | Unknown | No, no hysterectomy/adnexectomy | No hysterectomy/adnexectomy performed, diagnosis based on cervical biopsy, vagina wand biopsy and curettage    |
| 48                                                                                  | serous-like  | BRCA1 | 1989 | 47 | adenocarcinoma NOS, gr1     | serous                 | mutant                         | Yes  | p53-abnormal       | No                        | No      | No, not removed                 | Hysterectomy without adnexae                                                                                   |
| 49                                                                                  | serous-like  | BRCA1 | 1997 | 65 | EEC gr3                     | ambiguous              | mutant                         | Yes  | p53-abnormal       | No                        | Unknown | No                              | Hysterectomy with adnexae                                                                                      |
| 53                                                                                  | serous-like  | BRCA1 | 2001 | 65 | carcinosarcoma, unspecified | carcinosarcoma, serous | mutant                         | No   | p53-abnormal       | No                        | No      | Yes                             | Hysterectomy with adnexae                                                                                      |
| 25                                                                                  | serous-like  | BRCA2 | 2015 | 64 | serous                      | serous                 | mutant <sup>d</sup>            | No   | p53-abnormal       | Yes, 4.5                  | No      | Yes                             | Hysterectomy without adnexae (history RRSO)                                                                    |
| 29                                                                                  | serous-like  | BRCA2 | 2006 | 57 | serous                      | serous                 | mutant <sup>d</sup>            | No   | p53-abnormal       | Yes, 6.1                  | No      | Yes                             | Hysterectomy without adnexae (history RRSO)                                                                    |
| 32                                                                                  | serous-like  | BRCA2 | 2009 | 62 | serous                      | serous                 | mutant <sup>d</sup>            | No   | p53-abnormal       | No                        | No      | Yes                             | Hysterectomy with adnexae                                                                                      |
| 55                                                                                  | serous-like  | BRCA2 | 2009 | 68 | large cell carcinoma NOS    | ambiguous              | mutant                         | Yes  | p53-abnormal       | No                        | Unknown | No, no hysterectomy/adnexectomy | No hysterectomy/adnexectomy performed, diagnoses based on vaginal and cervical biopsy                          |
| 36                                                                                  | sarcoma      | BRCA1 | 2007 | 33 | low-grade ESS               | low-grade ESS          | wildtype                       | No   | Other              | No                        | No      | Yes                             | Hysterectomy without adnexae, fallopian tubes were removed shortly prior to hysterectomy during uterine biopsy |
| 42                                                                                  | sarcoma      | BRCA2 | 1995 | 53 | leiomyosarcoma              | leiomyosarcoma         | wildtype                       | No   | Other              | No                        | No      | No, not removed                 | Hysterectomy without adnexae                                                                                   |
| 46                                                                                  | sarcoma      | BRCA2 | 2001 | 54 | adenosarcoma                | adenosarcoma           | wildtype                       | No   | Other              | No                        | No      | No, not removed                 | Hysterectomy without adnexae                                                                                   |
| 59                                                                                  | clear cell   | BRCA1 | 2003 | 59 | clear cell carcinoma        | n.a.                   | n.a., considered TP53 wildtype | n.a. | Other <sup>e</sup> | No                        | No      | No                              | Unknown                                                                                                        |
| <b>Endometrial cancer outside observation period main analyses</b>                  |              |       |      |    |                             |                        |                                |      |                    |                           |         |                                 |                                                                                                                |
| 10                                                                                  | serous-like  | BRCA2 | 2016 | 49 | EEC gr1                     | carcinosarcoma, serous | mutant <sup>d</sup>            | Yes  | p53-abnormal       | Yes, 4.3                  | No      | Yes                             | Hysterectomy without adnexae (history RRSO)                                                                    |
| 54                                                                                  | serous-like  | BRCA1 | 1988 | 62 | adenocarcinoma NOS, gr3     | serous                 | mutant                         | Yes  | p53-abnormal       | No                        | No      | Yes, only left side resected    | Hysterectomy and left adnex                                                                                    |
| 57                                                                                  | endometrioid | BRCA2 | 2012 | 65 | EEC gr2                     | n.a.                   | n.a., considered TP53 wildtype | n.a. | Other <sup>e</sup> | yes, 12.1                 | No      | No                              | Hysterectomy without adnexae (history RRSO)                                                                    |
| <b>Not considered endometrial cancer after revision, outside observation period</b> |              |       |      |    |                             |                        |                                |      |                    |                           |         |                                 |                                                                                                                |
| 9                                                                                   | No EC        | BRCA1 | 1983 | 45 | endocervical adenocarcinoma | n.a.                   | n.a.                           | n.a. |                    | Yes, no EC after revision | No      | No                              | Unknown, RRSO one month before resection                                                                       |

Abbreviations: EEC: Endometrioid endometrial carcinoma, n.a.: not available, NOS: Not otherwise specified, RRSO: Risk-reducing salpingo-oophorectomy, EC: Endometrial cancer <sup>a</sup>CaseIDs number 1-41 correspond with CaseIDs from our previous publication; De Jonge and colleagues, CCR 2019. <sup>b</sup>Based on diagnoses after pathology review when available. <sup>c</sup>P53-status based on IHC, molecular analyses or most common pattern based on literature in case no FFPE blocks were available. "Mutant" includes both overexpression pattern and null-pattern. <sup>d</sup>P53-status based on mutational analyses (see de Jonge and colleagues, CCR 2019). <sup>e</sup>Molecular subgroup based on most prevalent p53 status for the histologic subtype, no FFPE-tumour tissue block was available for determining p53-status. <sup>f</sup>Tumour was also mismatch repair deficient and therefore considered as "other" molecular subgroup. <sup>g</sup>Ovaries were previously removed (without fallopian tubes); this was not considered as RRSO. <sup>h</sup>History of therapeutic ovariectomy because of ovarian clear cell carcinoma.



**Supplementary Table 6. Characteristics of endometrial cancers that occurred in the non-*BRCA1/2* mutation carrier cohort**

| Case ID                                                | Final histological subgroup <sup>a</sup> | Year | Age | Original Diagnoses         | Diagnoses after pathology review | P53 status <sup>b</sup>               | Molecular subgroup        | Category change histologic subgroup after review | RRSO, years in between RRSO-EC | Adnexal involvement/ (history of) ovarian malignancy                        | Adnexal specimens available for revision | Hysterectomy with/without adnexae |
|--------------------------------------------------------|------------------------------------------|------|-----|----------------------------|----------------------------------|---------------------------------------|---------------------------|--------------------------------------------------|--------------------------------|-----------------------------------------------------------------------------|------------------------------------------|-----------------------------------|
| <b>Included as endometrial cancer in main analyses</b> |                                          |      |     |                            |                                  |                                       |                           |                                                  |                                |                                                                             |                                          |                                   |
| 101                                                    | Endometrioid                             | 1990 | 46  | adenocarcinoma NOS, gr3    | n.a.                             | n.a., considered <i>TP53</i> mutant   | p53-abnormal <sup>c</sup> | n.a.                                             | No                             | No                                                                          | No                                       | Hysterectomy with adnexae         |
| 102                                                    | Endometrioid                             | 2010 | 53  | EEC gr1                    | EEC gr1                          | wildtype                              | other                     | No                                               | No                             | No                                                                          | No                                       | Hysterectomy with adnexae         |
| 104                                                    | Endometrioid                             | 2004 | 54  | EEC gr2                    | EEC gr1                          | wildtype                              | other                     | No                                               | No                             | Simultaneous EOC gr1 right side, considered as second primary               | Yes                                      | Hysterectomy with adnexae         |
| 105                                                    | Endometrioid                             | 2000 | 54  | EEC, gr not specified      | EEC gr1                          | wildtype                              | other                     | No                                               | No                             | No                                                                          | Yes                                      | Hysterectomy with adnexae         |
| 106                                                    | Endometrioid                             | 1998 | 65  | Adenocarcinoma NOS gr2     | EEC gr2                          | wildtype                              | other                     | No                                               | No                             | No                                                                          | No                                       | Hysterectomy with adnexae         |
| 108                                                    | Endometrioid                             | 2009 | 58  | EEC gr1                    | EEC gr1                          | wildtype                              | other                     | No                                               | No                             | No                                                                          | Yes                                      | Hysterectomy with adnexae         |
| 110                                                    | Endometrioid                             | 2005 | 60  | adenocarcinoma NOS gr1     | EEC gr1                          | n.a., considered <i>TP53</i> wildtype | other <sup>f</sup>        | No                                               | No                             | No                                                                          | Yes                                      | Hysterectomy with adnexae         |
| 111                                                    | Endometrioid                             | 2003 | 37  | adenocarcinoma NOS gr1     | EEC gr1                          | wildtype                              | other                     | No                                               | Unknown                        | No                                                                          | No, not removed                          | Hysterectomy without adnexae      |
| 112                                                    | Endometrioid                             | 2007 | 49  | adenocarcinoma NOS gr1     | EEC gr1                          | wildtype                              | other                     | No                                               | No                             | Simultaneous EOC right side, considered as second primary                   | Yes, left side not removed               | Hysterectomy with right adnex     |
| 113                                                    | Endometrioid                             | 1997 | 48  | EEC gr1                    | EEC gr1                          | wildtype                              | other                     | No                                               | No                             | No                                                                          | yes                                      | Hysterectomy with adnexae         |
| 114                                                    | Endometrioid                             | 2008 | 57  | EEC gr 2                   | EEC gr3                          | wildtype                              | other                     | No                                               | No                             | No                                                                          | yes                                      | Hysterectomy with adnexae         |
| 115                                                    | Endometrioid                             | 2007 | 67  | EEC gr1                    | EEC gr1                          | wildtype                              | other                     | No                                               | No                             | No                                                                          | yes                                      | Hysterectomy with adnexae         |
| 116                                                    | Endometrioid                             | 2002 | 66  | adenocarcinoma NOS gr2     | EEC gr1                          | wildtype                              | other                     | No                                               | No                             | Simultaneous bilateral serous borderline tumour/low-grade serous carcinoma. | yes                                      | Hysterectomy with adnexae         |
| 117                                                    | Endometrioid                             | 1999 | 53  | adenocarcinoma NOS gr2     | EEC gr2                          | wildtype                              | other                     | No                                               | No                             | No                                                                          | No                                       | Hysterectomy with adnexae         |
| 118                                                    | Endometrioid                             | 2002 | 62  | EIN/ adenocarcioma NOS gr1 | EEC gr1                          | wildtype                              | other                     | No                                               | No                             | No                                                                          | No                                       | Hysterectomy with adnexae         |
| 121                                                    | Endometrioid                             | 2011 | 60  | EEC gr1                    | EEC gr1                          | wildtype                              | other                     | No                                               | No                             | No                                                                          | Yes                                      | Hysterectomy with adnexae         |
| 124                                                    | Endometrioid                             | 1999 | 56  | adenocarcinoma NOS, gr1-2  | EEC gr1                          | wildtype                              | other                     | No                                               | No                             | No                                                                          | Yes                                      | Hysterectomy with adnexae         |
| 126                                                    | Endometrioid                             | 2004 | 52  | adenocarcinoma NOS gr1     | EEC gr1                          | wiltype                               | other                     | No                                               | No                             | No                                                                          | No, not removed                          | Hysterectomy without adnexae      |
| 129                                                    | Endometrioid                             | 2011 | 64  | EEC gr3                    | n.a.                             | n.a., considered <i>TP53</i> wildtype | other <sup>f</sup>        | n.a.                                             | No                             | No                                                                          | No                                       | Hysterectomy with adnexae         |
| 130                                                    | Endometrioid                             | 2000 | 57  | EEC gr1                    | n.a.                             | n.a., considered <i>TP53</i> wildtype | other <sup>f</sup>        | n.a.                                             | Unknown                        | No                                                                          | No, unknown if removed                   | Unknown                           |
| 131                                                    | Endometrioid                             | 2002 | 63  | EEC gr2                    | n.a.                             | n.a., considered <i>TP53</i> wildtype | other <sup>f</sup>        | n.a.                                             | No                             | No                                                                          | No, unknown if removed                   | Unknown                           |

|                                                                  |              |      |    |                                             |                              |                                   |                    |       |                       |                                                 |                        |                                                                                        |
|------------------------------------------------------------------|--------------|------|----|---------------------------------------------|------------------------------|-----------------------------------|--------------------|-------|-----------------------|-------------------------------------------------|------------------------|----------------------------------------------------------------------------------------|
| 132                                                              | Endometrioid | 2010 | 74 | EEC gr2                                     | n.a.                         | n.a., considered<br>TP53 wildtype | other <sup>c</sup> | n.a.  | No                    | No                                              | No                     | Hysterectomy with adnexae                                                              |
| 133                                                              | Endometrioid | 2010 | 53 | EEC gr2                                     | n.a.                         | n.a., considered<br>TP53 wildtype | other <sup>c</sup> | n.a.  | Yes, 2.7 <sup>d</sup> | No                                              | No                     | Unknown                                                                                |
| 134                                                              | Endometrioid | 2008 | 58 | EEC gr2                                     | n.a.                         | n.a., considered<br>TP53 wildtype | other <sup>c</sup> | n.a.  | No                    | No                                              | No, unknown if removed | Unknown                                                                                |
| 135                                                              | Endometrioid | 2002 | 49 | EEC gr1                                     | n.a.                         | n.a., considered<br>TP53 wildtype | other <sup>c</sup> | n.a.  | No                    | No                                              | No                     | hysterectomy with right adnex                                                          |
| 136                                                              | Endometrioid | 2007 | 72 | EEC gr1                                     | n.a.                         | n.a., considered<br>TP53 wildtype | other <sup>c</sup> | n.a.  | No                    | No                                              | No                     | hysterectomy with right adnex                                                          |
| 137                                                              | Endometrioid | 2011 | 29 | EEC gr1                                     | n.a.                         | n.a., considered<br>TP53 wildtype | other <sup>c</sup> | n.a.  | No                    | Simultaneous bilateral serous borderline tumour | No                     | Hysterectomy with adnexae                                                              |
| 138                                                              | Endometrioid | 1999 | 60 | adenocarcinoma NOS gr2                      | n.a.                         | n.a., considered<br>TP53 wildtype | other <sup>c</sup> | n.a.  | No                    | No                                              | No, unknown if removed | Unknown                                                                                |
| 139                                                              | Endometrioid | 1999 | 51 | adenocarcinoma NOS gr unspecified           | n.a.                         | n.a., considered<br>TP53 wildtype | other <sup>c</sup> | n.a.  | No                    | No                                              | No                     | Hysterectomy with adnexae                                                              |
| 140                                                              | Endometrioid | 2007 | 53 | EEC gr 1                                    | n.a.                         | n.a., considered<br>TP53 wildtype | other <sup>c</sup> | n.a.  | No                    | No                                              | No, unknown if removed | Unknown                                                                                |
| 103                                                              | Serous-like  | 1997 | 53 | carcinosarcoma, unspecified                 | carcinosarcoma, endometrioid | wildtype                          | other              | No    | No                    | No                                              | Yes                    | Hysterectomy with adnexae                                                              |
| 123                                                              | Serous-like  | 2007 | 72 | carcinosarcoma, endometrioid                | carcinosarcoma, serous       | mutant                            | other              | No    | No                    | Simultaneous bilateral serous adenocarcinoma    | No                     | Hysterectomy with adnexae                                                              |
| 128                                                              | Serous-like  | 2009 | 79 | serous                                      | serous                       | mutant                            | p53-abnormal       | No    | No                    | No                                              | Yes                    | Hysterectomy with adnexae                                                              |
| <b>Endometrial cancer outside follow-up window main analyses</b> |              |      |    |                                             |                              |                                   |                    |       |                       |                                                 |                        |                                                                                        |
| 107                                                              | Endometrioid | 2012 | 55 | EEC gr1                                     | EEC gr1                      | wildtype                          | other              | No    | No                    | No                                              | Yes                    | Hysterectomy with adnexae                                                              |
| 109                                                              | Endometrioid | 2013 | 69 | EEC gr1                                     | EEC gr1                      | wildtype                          | other              | No    | No                    | No                                              | Yes                    | Hysterectomy with adnexae                                                              |
| 119                                                              | Endometrioid | 2012 | 56 | undifferentiated/dedifferentiated carcinoma | dedifferentiated carcinoma   | wildtype                          | other              | No    | No                    | No                                              | Yes                    | Hysterectomy with adnexae                                                              |
| 120                                                              | Endometrioid | 2014 | 71 | EEC gr1                                     | EEC gr2                      | wildtype                          | other              | No    | No                    | No                                              | Yes                    | Hysterectomy with adnexae                                                              |
| 127                                                              | Serous-like  | 2012 | 65 | carcinosarcoma, unspecified                 | carcinosarcoma, serous       | mutant                            | p53-abnormal       | No    | No                    | No                                              | No                     | No hysterectomy/adnex extirpation performed (diagnosis based on endometrial curettage) |
| <b>Not considered endometrial cancer after revision</b>          |              |      |    |                                             |                              |                                   |                    |       |                       |                                                 |                        |                                                                                        |
| 122                                                              | No EC        | 1990 | 59 | adenosquamous EC                            | adenosquamous carcinoma      | mutant                            | No EC              | No EC | Unknown               | No                                              | No, not removed        | Hysterectomy without adnexae                                                           |
| 125                                                              | No EC        | 2003 | 60 | EEC gr2                                     | HGSOC                        | mutant                            | No EC              | No EC | No                    | Bilateral HGSOC with endometrial involvement    | Yes                    | Hysterectomy with adnexae                                                              |

Abbreviations: EEC: Endometrioid endometrial carcinoma, EIN: Endometrioid intra-epithelial neoplasia, n.a.: not available, NOS: Not otherwise specified, RRSO: Risk-reducing salpingo-oophorectomy, EC: Endometrial cancer <sup>a</sup>Based on diagnoses after pathology review when available. <sup>b</sup>P53-status based on IHC, molecular analyses or most common pattern based on literature in case no FFPE blocks were available. "Mutant" includes both overexpression pattern and null-pattern. <sup>c</sup>Molecular subgroup based on most prevalent p53 status for the histologic subtype, no FFPE-tumour tissue block was available for determining p53 status. <sup>d</sup>One ovary previously removed.

**Supplementary Table 7. Additional sensitivity analyses endometrial cancer risks *BRCA1/2* mutation carriers versus non-*BRCA1/2* mutation carriers**

| Subgroups                                                                                                              | <i>BRCA1/2</i> carriers |              |                      | non- <i>BRCA1/2</i> carriers |              |                            | Hazard Ratio (95% CI) <sup>a</sup> | <i>p</i> value <sup>b</sup> |
|------------------------------------------------------------------------------------------------------------------------|-------------------------|--------------|----------------------|------------------------------|--------------|----------------------------|------------------------------------|-----------------------------|
|                                                                                                                        | Total (No.)             | Events (No.) | Person-years at risk | Total (No.)                  | Events (No.) | Person-years at risk (No.) |                                    |                             |
| Start follow-up from date <i>BRCA</i> DNA test, excluding cases for which date of <i>gBRCA1/2</i> DNA test was unknown |                         |              |                      |                              |              |                            |                                    |                             |
| All histotypes                                                                                                         | 4104                    | 28           | 29821                | 6885                         | 7            | 30055                      | 3.79 (1.61-8.91)                   | 0.002                       |
| Endometrioid                                                                                                           | 4104                    | 17           | 29821                | 6885                         | 6            | 30055                      | 3.76 (1.41-9.97)                   | 0.01                        |
| Serous-like                                                                                                            | 4104                    | 10           | 29821                | 6885                         | 1            | 30055                      | 12.39 (1.49-103.29)                | 0.02                        |
| p53-abnormal <sup>c</sup>                                                                                              | 4104                    | 16           | 29821                | 6885                         | 1            | 30055                      | 20.06 (2.56-157.22)                | 0.004                       |
| <i>BRCA1</i> , all histotypes <sup>d</sup>                                                                             | 2493                    | 22           | 18744                | 6885                         | 7            | 30055                      | 7.26 (2.96-17.82)                  | <0.001                      |
| <i>BRCA2</i> , all histotypes <sup>d</sup>                                                                             | 1640                    | 6            | 11298                | 6885                         | 7            | 30055                      | 2.46 (0.72-8.44)                   | 0.15                        |
| End follow-up 01-01-2012 for all included women                                                                        |                         |              |                      |                              |              |                            |                                    |                             |
| All                                                                                                                    | 5936                    | 48           | 105609               | 8451                         | 33           | 160841                     | 2.37 (1.52-3.69)                   | <0.001                      |
| Endometrioid                                                                                                           | 5936                    | 29           | 105609               | 8451                         | 30           | 160841                     | 1.51 (0.91-2.52)                   | 0.11                        |
| Serous-like                                                                                                            | 5936                    | 15           | 105609               | 8451                         | 3            | 160841                     | 8.16 (2.36-28.22)                  | 0.001                       |
| p53-abnormal <sup>c</sup>                                                                                              | 5936                    | 20           | 105609               | 8451                         | 3            | 160841                     | 10.95 (3.25-36.87)                 | <0.001                      |
| <i>BRCA1</i> , all histotypes <sup>d</sup>                                                                             | 3796                    | 36           | 66700                | 8451                         | 33           | 160841                     | 2.78 (1.73-4.46)                   | <0.001                      |
| <i>BRCA2</i> , all histotypes <sup>d</sup>                                                                             | 2181                    | 12           | 39704                | 8451                         | 33           | 160841                     | 1.45 (0.75-2.81)                   | 0.27                        |
| Additional censoring BC <sup>e</sup>                                                                                   |                         |              |                      |                              |              |                            |                                    |                             |
| All                                                                                                                    | 5689                    | 32           | 88493                | 8311                         | 21           | 139488                     | 2.83 (1.62-4.95)                   | <0.001                      |
| Endometrioid                                                                                                           | 5689                    | 22           | 88493                | 8311                         | 20           | 139488                     | 1.75 (0.95-3.24)                   | 0.07                        |
| Serous-like                                                                                                            | 5689                    | 6            | 88493                | 8311                         | 1            | 139488                     | 8.90 (1.04-76.54)                  | 0.05                        |
| p53-abnormal <sup>c</sup>                                                                                              | 5689                    | 9            | 88493                | 8311                         | 1            | 139488                     | 14.25 (1.77-114.22)                | 0.01                        |
| <i>BRCA1</i> , all histotypes <sup>d</sup>                                                                             | 3610                    | 22           | 53898                | 8311                         | 21           | 139488                     | 2.61 (1.41-4.84)                   | 0.002                       |
| <i>BRCA2</i> , all histotypes <sup>d</sup>                                                                             | 2115                    | 10           | 35239                | 8311                         | 21           | 139488                     | 1.97 (0.93-4.19)                   | 0.08                        |
| Additional censoring HT-BC including cases for which HT was unknown <sup>e</sup>                                       |                         |              |                      |                              |              |                            |                                    |                             |
| All histotypes                                                                                                         | 5895                    | 49           | 110215               | 8407                         | 30           | 153443                     | 2.30 (1.44-3.68)                   | <0.001                      |

Abbreviations: BC: Breast Cancer, HT: Hormone Treatment

<sup>a</sup>Hazard ratios were adjusted for age.

<sup>b</sup>The P values assessing the null hypothesis of HR=1.00.

<sup>c</sup>Includes cases for which p53-status was unknown (no FFPE tumour block available) and for which p53-status was based on the most common p53-status for the histotype.

<sup>d</sup>Women with both a *BRCA1* and a *BRCA2* mutation were included in both analyses stratified for *gBRCA1/2*-mutation status.

<sup>e</sup>DCIS was considered as BC.

**Supplementary Table 8. Observed and expected endometrial cancer rates in non-*BRCA1/2* mutation carriers, compared to the Dutch country-specific incidence rates**

| EC subtype              | non- <i>BRCA1/2</i> carriers | Dutch population | SIR (95% CI)     | P value <sup>a</sup> |
|-------------------------|------------------------------|------------------|------------------|----------------------|
|                         | Observed                     | Expected         |                  |                      |
| All endometrial cancers | 33                           | 26.81            | 1.23 (0.88-1.73) | 0.14                 |
| Histologic groups       |                              |                  |                  |                      |
| Endometrioid            | 30                           | 22.14            | 1.35 (0.95-1.94) | 0.06                 |
| Serous-like             | 3                            | 2.39             | 1.26 (0.40-3.89) | 0.43                 |
| Sarcoma                 | 0                            | 1.73             | NA               | NA                   |
| Clear cell              | 0                            | 0.36             | NA               | NA                   |

Abbreviations: SIR: Standardized Incidence Ratio, CI: Confidence Interval. NA: not applicable  
<sup>a</sup>*p* values were estimated assuming a Poisson distribution.

**Supplementary Table 9. Cumulative endometrial cancer risks for *BRCA1/2* mutation carriers by the age of 75 years**

| <b>EC subtype</b>       | <b>Cumulative risk<br/>(%, 95% CI)</b> |
|-------------------------|----------------------------------------|
| All Endometrial cancers | <b>2.97 (2.20-3.91)</b>                |
| <i>BRCA1</i>            | 3.49 (2.46-4.81)                       |
| <i>BRCA2</i>            | 1.97 (1.09-3.30)                       |
| Histologic groups       |                                        |
| Serous-like             | <b>1.14 (0.69-1.80)</b>                |
| <i>BRCA1</i>            | 1.42 (0.79-2.37)                       |
| <i>BRCA2</i>            | 0.64 (0.21-1.60)                       |
| Endometrioid            | <b>1.70 (1.14-2.44)</b>                |
| <i>BRCA1</i>            | 1.97 (1.23-3.01)                       |

Abbreviations, CI: confidence interval

## Supplementary Figure 1.

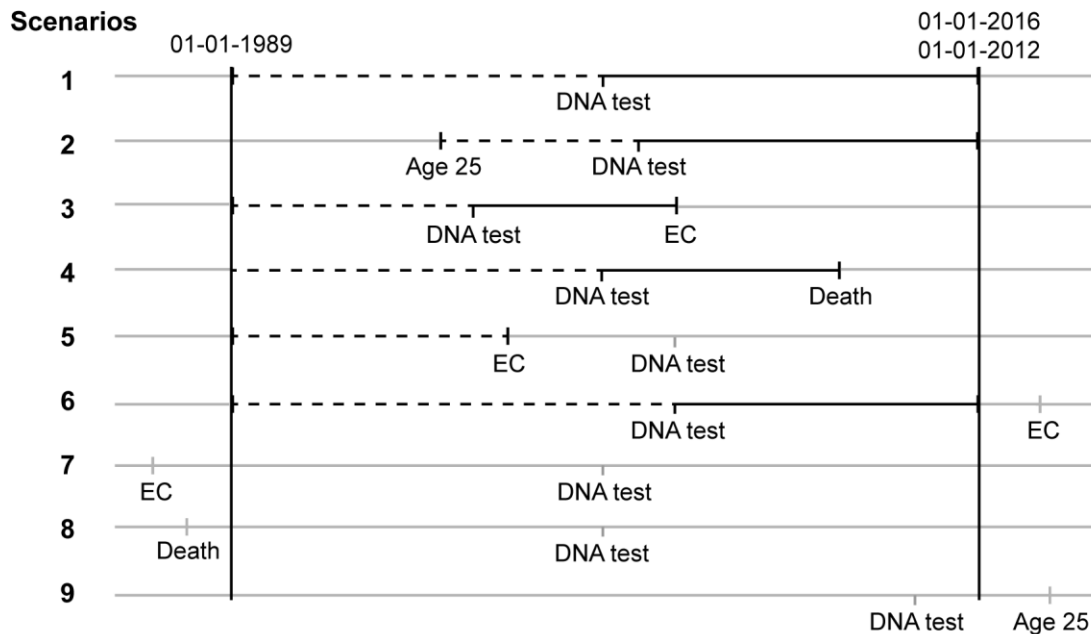

### Legend:

- ┆ - - - - Follow-up pre-*BRCA* DNA test
- ┆ Follow-up post-*BRCA* DNA test
- ┆ - - —┆ Person-years at risk
- Person-years outside/not included in observation period

**Supplementary Figure 1. Schematic overview of the composition of different observation period scenarios.** Follow-up started on the date of nationwide PALGA coverage (01-01-1989) or on the date of attaining 25 years of age (whichever was later). Follow-up ended at date of endometrial cancer diagnosis, date of death, or date of end of follow-up (01-01-2016 for *BRCA1/2* mutation carriers who provided informed consent, 01-01-2012 for all others). The observation period comprised both person-years at risk before *BRCA* DNA testing (dashed line) and person-years at risk after *BRCA* DNA testing (continuous line). Scenario 1 displays the maximum possible observation period. In case endometrial cancer or death occurred before the start of follow-up (scenarios 7 and 8), or age 25 was reached after end of follow-up (scenario 9), cases were excluded. Endometrial cancers that occurred after end of follow-up (scenario 6) were not included as events in the study. Abbreviations; EC: Endometrial cancer
